# Supplementary material for: Photocatalytic hydrogen production by donor–π–acceptor type covalent triazine frameworks involving different π bridges
Source: Royal Society of Chemistry journal article supplement (doi:10.1039/d3nj04479c), 2023-01-01
Supplement: d3nj04479c1.pdf [file d3nj04479c1.pdf]

## Supporting information

### Study on the photocatalytic hydrogen production of covalent triazine framework regulated by different $\pi$ bridges

*Xiangyu Li<sup>a,b</sup>, Minghui Chen<sup>a,b</sup>, Quan Shi<sup>a,b</sup>, Ji Xiong<sup>a,b</sup>, Ting Li<sup>a,b</sup>, Yu Jiang<sup>a,b</sup>, Prof. Yaqing  
Feng<sup>a,b</sup>, Prof. Bao Zhang<sup>a,b,c,\*</sup>*

a. School of Chemical Engineering and Technology, Tianjin University, Tianjin 300350, China.

E-mail: [baozhang@tju.edu.cn](mailto:baozhang@tju.edu.cn)

b. Guangdong Laboratory of Chemistry and Fine Chemical Industry Jieyang Center, Guangdong  
Province, 522000, P. R. China

c. Haihe Laboratory of Sustainable Chemical Transformations, Tianjin 300192, China.

#### Corresponding authors:

[baozhang@tju.edu.cn](mailto:baozhang@tju.edu.cn) (B. Zhang)

## 1. Experimental and characterization details

### 1.1 Chemicals and reagents

All chemicals and reagents were used as received from commercial sources without further purification. N, N-dimethylformamide (DMF), Dimethyl sulfoxide (DMSO), p-benzamidine dihydrochloride, Nafion perfluorinated resin solution were purchased from Aladdin industrial corporation, Shanghai, China.  $K_2CO_3$  was purchased from Kmart chemical technology limited company, Tianjin, China.  $Cs_2CO_3$ , 1,3,5-tris(4,4,5,5-tetramethyl-1,3,2-dioxaborolan-2-yl)benzene,  $Pd(PPh_3)_4$ , 1,3,5-Tris(p-formylphenyl)benzene and 5,5',5''-(Benzene-1,3,5-triyl)tris(thiophene-2-carbaldehyde) were purchased from Shanghai bide Pharmaceutical Technology Co. Dichloromethane, acetone, hydrochloric acid, saturated sodium bicarbonate, anhydrous sodium sulfate, petroleum ether, ethanol, Silicone (200-300 mesh) were purchased from Jiangtian chemical technology limited company, Tianjin, China.

### 1.2 Characterization methods

Liquid 1D  $^1H$  NMR spectra of all monomers were recorded on a Bruker AVANCE IIIITM HD 400 MHz NanoBAY. And 600 M solid-state  $^{13}C$  Nuclear Magnetic Resonance ( $^{13}C$  NMR) spectra were measured on the JEOL JNM ECZ600R. Powder X ray diffraction (PXRD) data were collected on Rigaku Smartlab8KW using Cu  $K\alpha$  radiation at 40 kV,40 mA power. Fourier-transform infrared (FT-IR) spectra was recorded on Nicolet6700 instrument (600-3500  $cm^{-1}$  region). The Brunauer-Emmett-Teller (BET) surface areas were measured by nitrogen adsorption and desorption at 77 K using Autosorb-iQ2-MP and the samples were activated at 100 °C for 8 h under vacuum before analysis. Pore size distributions and pore volumes were derived from the adsorption branches of the isotherms using the density functional theory (DFT) pore mode. A Field

Emission Scanning Electron Microscope (FE-SEM) images were obtained with a Regulus 8100 electron microscope (Japan, Hitachi Limited). High-resolution Transmission Electron Microscopies (HR-TEM) and energy dispersive spectroscopy (EDS) were performed using JEOL model JEM-F200. The X-ray photoelectron spectroscopy (XPS) analysis was obtained by ESCALAB 250xi, Thermo Scientific. UV-Visible diffuse reflectance spectra (DRS) were obtained by Lambda 750, Perkin Elmer with an integrating sphere mode. The steady photoluminescence(PL) data was measured by FLS1000 fluorescence spectrometer in the solid state. Electrochemical properties of the material frameworks were measured through a three-electrode system in an electrochemical workstation with a brand of CHI66, Chenhua. For these measurements, 5 mg CTFs was dispersed into the mixed solvent of 1 mL ethanol and 0.2 mL 5wt% Nafion aqueous solution by ultrasonic 60 min. After that, 20  $\mu$ L suspension was deposited onto clean  $\Phi$ 3 GCE as the working electrode. And the Ag/AgCl electrode worked as the reference electrode and Pt flake was acted as the counter electrode. 0.2 M Na<sub>2</sub>SO<sub>4</sub> aqueous solution acted as electrolyte during the measurements. The photocatalytic performance was recorded by Labsolar6A, Perfectlight. The production of H<sub>2</sub> was detected by an online gas chromatograph (TCD detector, N<sub>2</sub> carrier, 5Å molecular sieve column) at given times intervals. The light source was a 300 W xenon lamp (Perfectlight, PLS-SXE300 + /UV) simulated AM 1.5 G illumination.

## 2. Preparation procedures

### Synthesis of BenP-CHO((1,3,5-tris(4',4'',4'''-formylpyridine) benzene)

The monomer was synthesized according to the previously literature[1]. A mixture of 1,3,5-tris(4,4,5,5-tetramethyl-1,3,2-dioxaborolan-2-yl) benzene (680 mg, 1.5 mmol), 5-bromo-2-pyridinecarboxaldehyde (1.25 mg, 6.7 mmol),  $K_2CO_3$  (3 g, 22 mmol),  $Pd(PPh_3)_4$  (516.9 mg, 0.44 mmol) in anhydrous DMF (100 mL) was degassed and stirred under  $N_2$  atmosphere at 90 °C for 24h. The solvent was removed under reduced pressure and the solid residue triturated with water, collected by filtration and washed with water ( $3 \times 10$  ml), hot diethyl ether ( $2 \times 10$  ml) and hot hexane ( $2 \times 10$  ml). The dried solid was triturated with  $CH_2Cl_2$  and collected again. The resulting product was redissolved in hot  $CHCl_3$ , the insoluble materials filtered off and  $Et_2O$  added to the filtrate to precipitate out pure product A as a pale-yellow solid (230 mg, 40%).  $^1H$  NMR (600 MHz, )  $\delta$  10.15 (s, 1H), 9.11 (s, 1H), 8.17 (d, 1H), 8.11 (d, 1H), 7.94 (s, 1H).

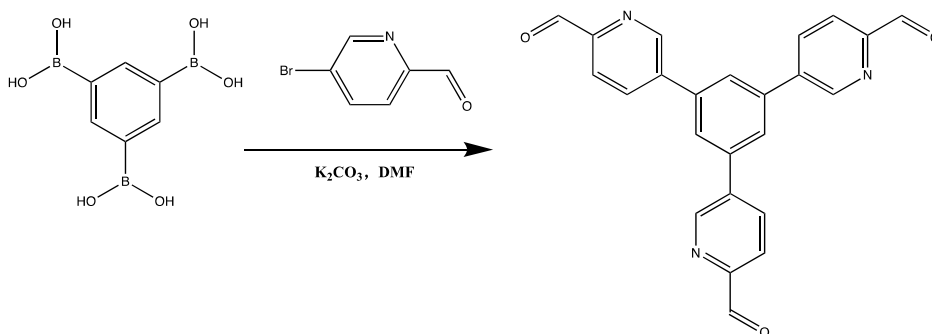

**Figure S1.** Synthetic route of BenP-CHO

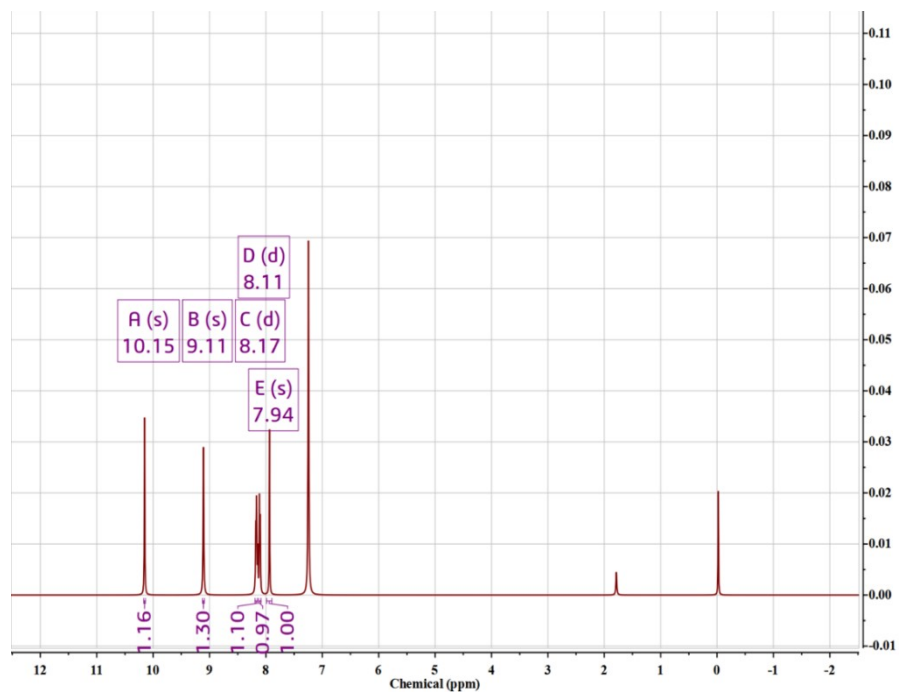

**Figure S2.** The  $^1\text{H}$  NMR spectra of BenP-CHO in  $\text{CDCl}_3$ .

### 3. Characterization

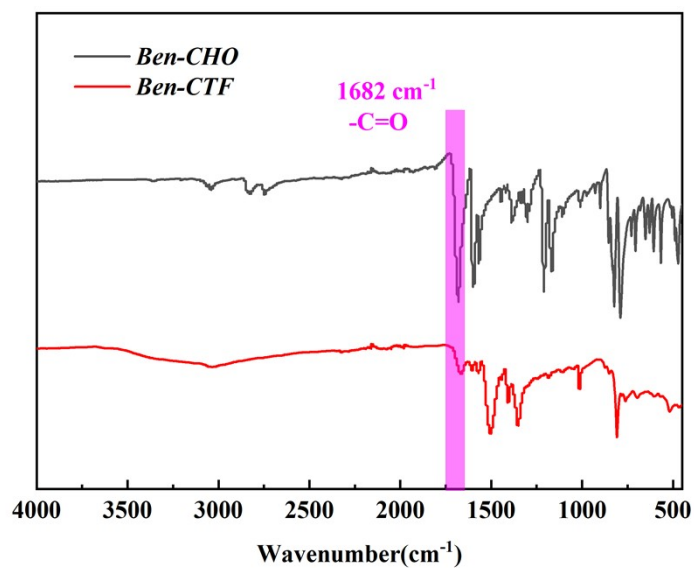

**Figure S3.** FT-IR spectrum of Ben-CTF with starting molecules (Ben-CHO).

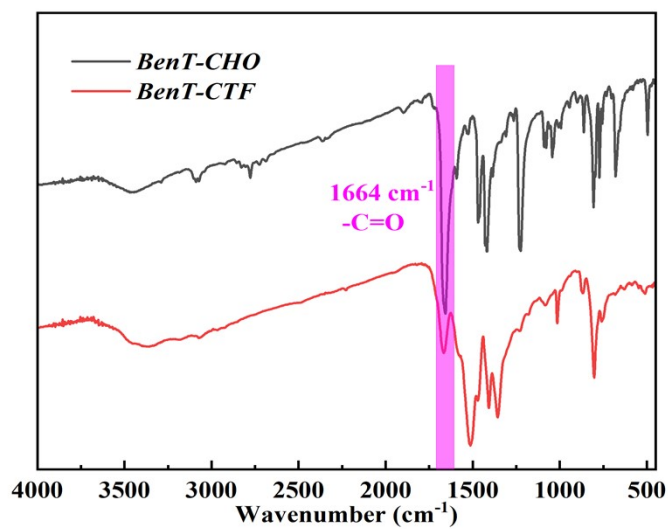

**Figure S4.** FT-IR spectrum of BenT-CTF with starting molecules (BenT-CHO).

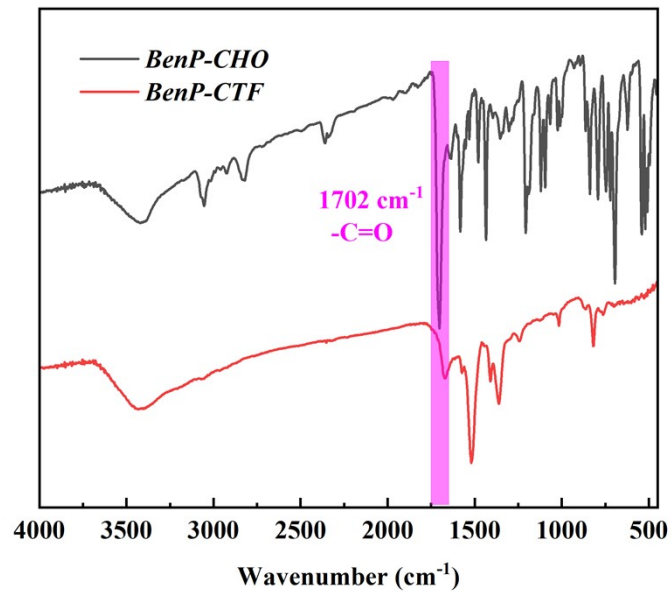

**Figure S5.** FT-IR spectrum of BenP-CTF with starting molecules (BenP-CHO).

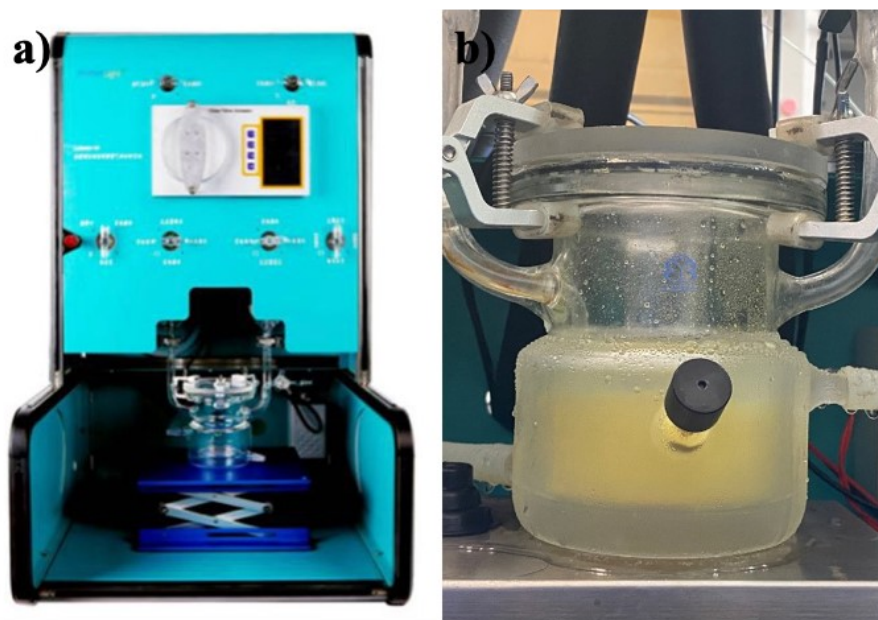

**Figure S6.** (a) Photograph of the photocatalytic on-line analytical system (Labsolar-6A, PerfectLight); (b) Quartz reactor with condensate.

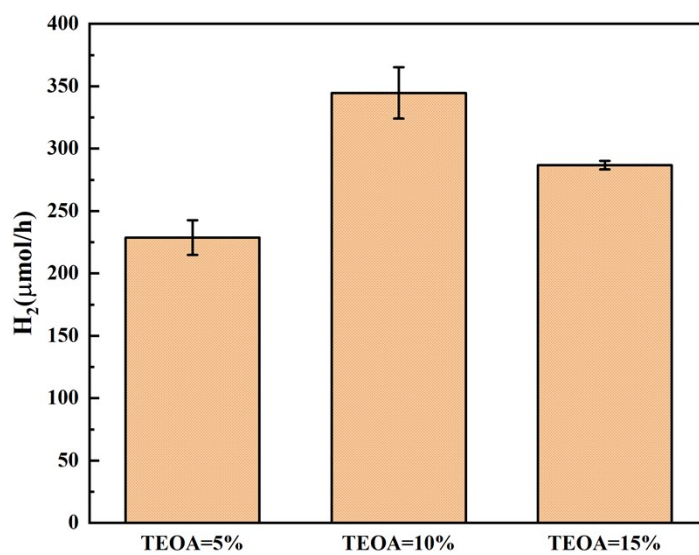

**Figure S7.** Photocatalytic performance of BenP-CTF in different amount of TEOA.

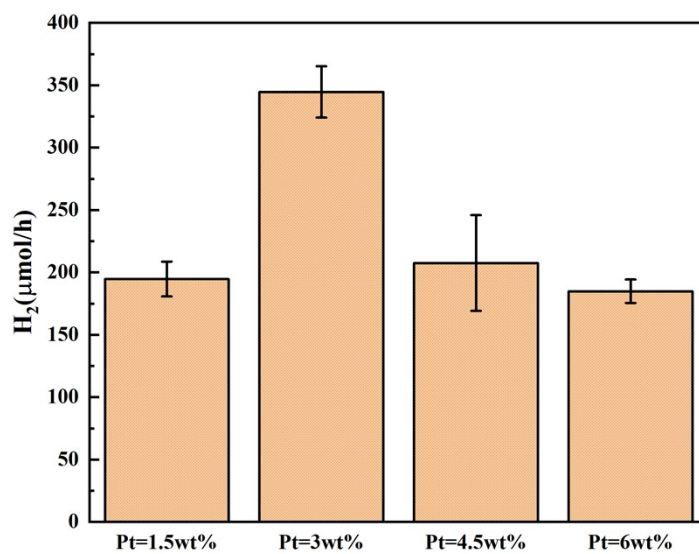

**Figure S8.** Photocatalytic performance of BenP-CTF in different amount of Pt.



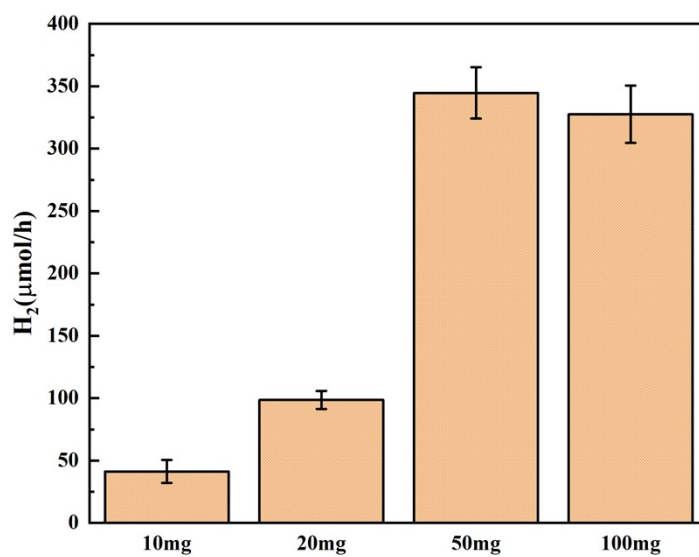

**Figure S9.** Photocatalytic performance of BenP-CTF in different amount of CTF.

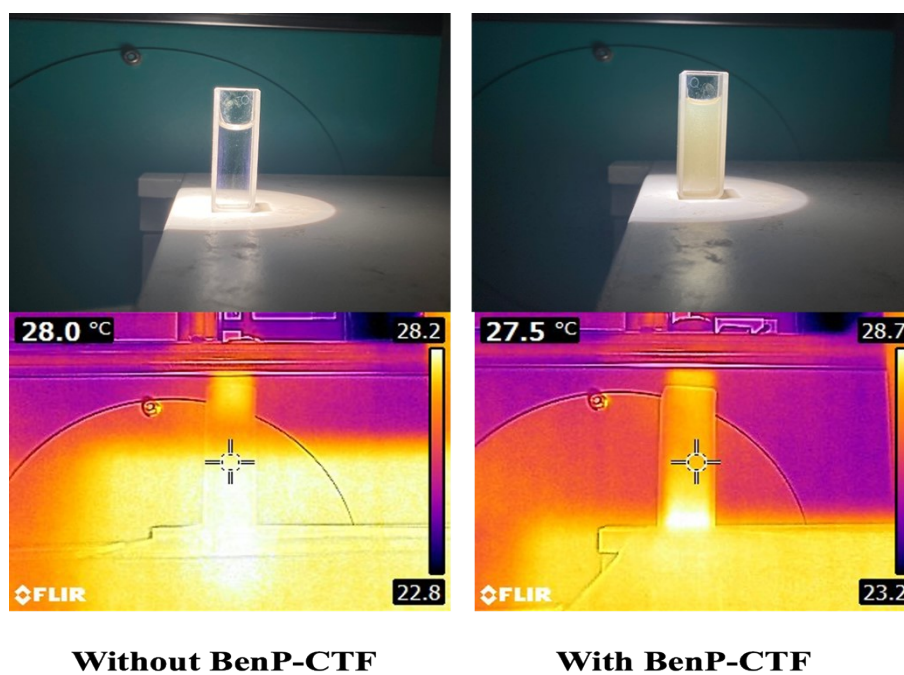

**Figure S10.** Photothermal experiment for BenP-CTF under a 300 W xenon lamp simulated AM 1.5 G illumination.

As shown in the Figure S10, after 1h, 10% aqueous solution of TEOA containing BenP-CTF under a 300 W xenon lamp simulated AM 1.5 G illumination did not exhibit an increased temperature compared to that without BenP-CTF under the same conditions.

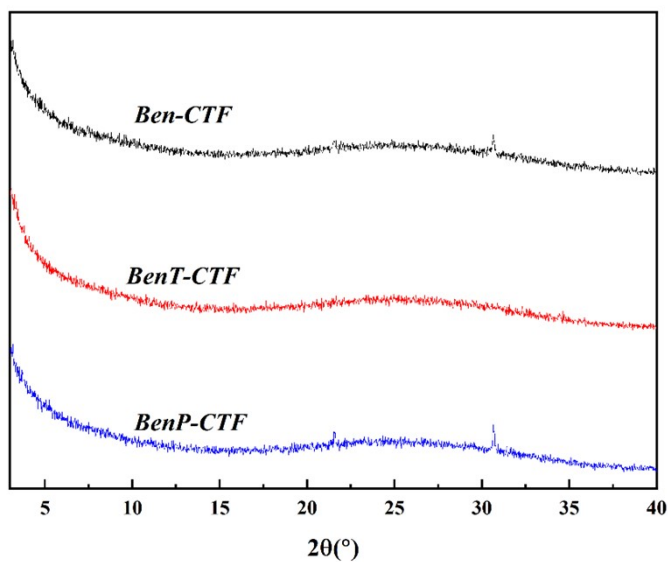

**Figure S11.** PXRD spectrum of Ben-CTF, BenT-CTF, and BenP-CTF.

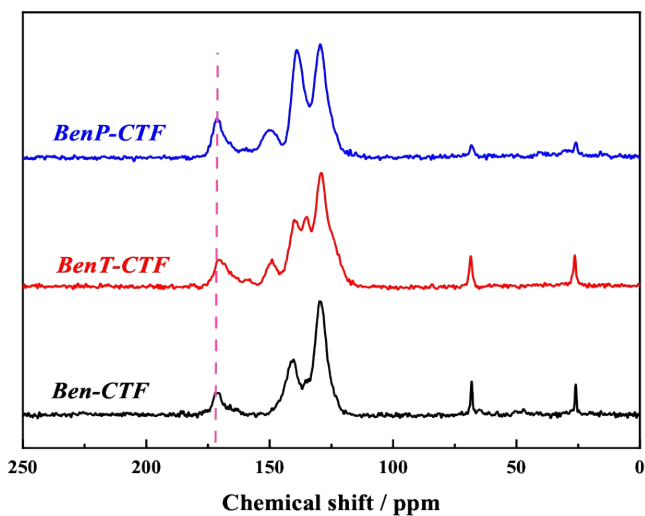

**Figure S12.** The full solid-state  $^{13}\text{C}$  NMR spectra of all final CTFs.

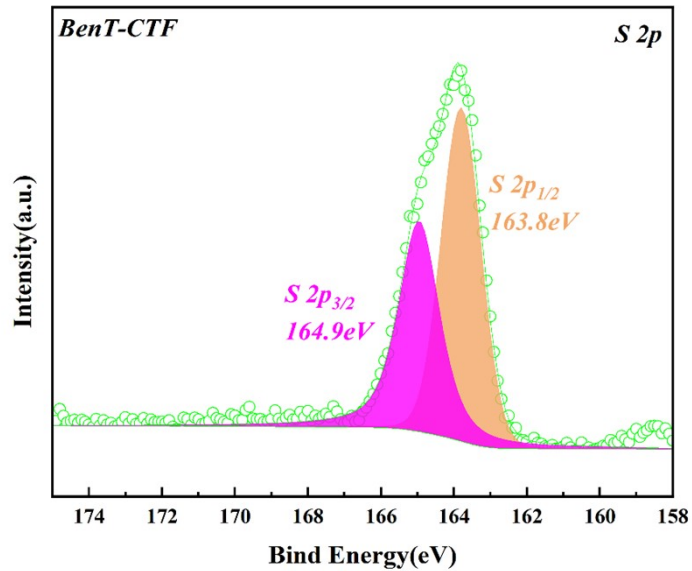

**Figure S13.** High-resolution XPS S 2p spectra of BenT-CTF.

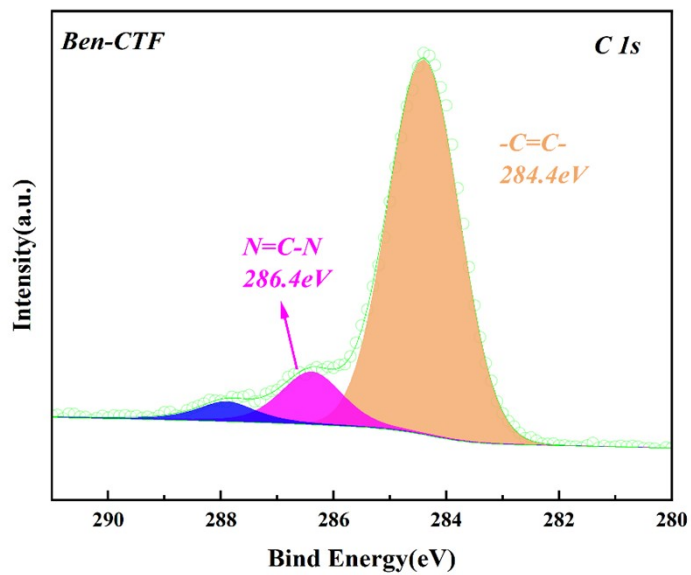

**Figure S14.** High-resolution XPS C 1s spectra of Ben-CTF.

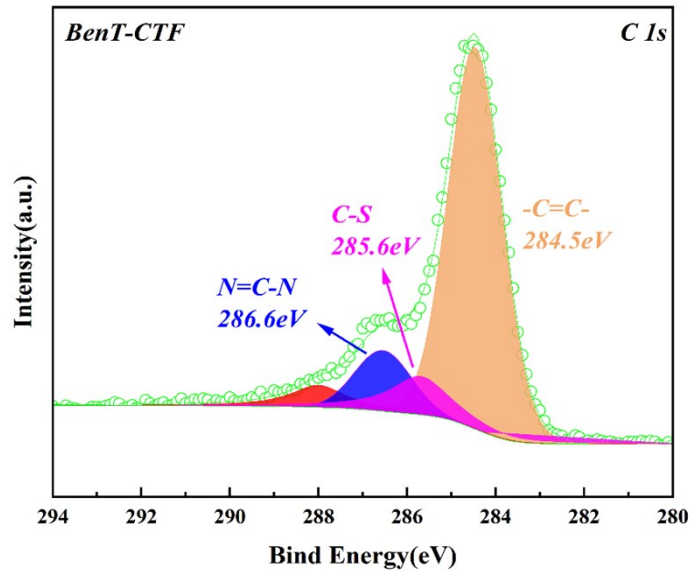

**Figure S15.** High-resolution XPS C 1s spectra of BenT-CTF.

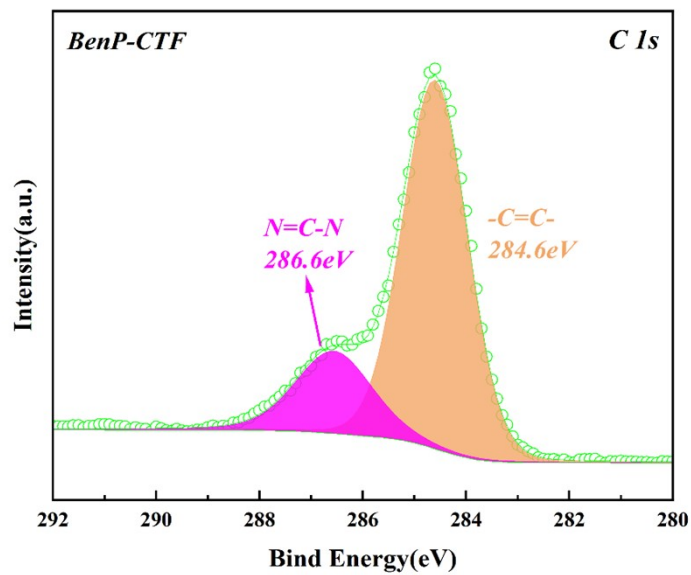

**Figure S16.** High-resolution XPS C 1s spectra of BenP-CTF

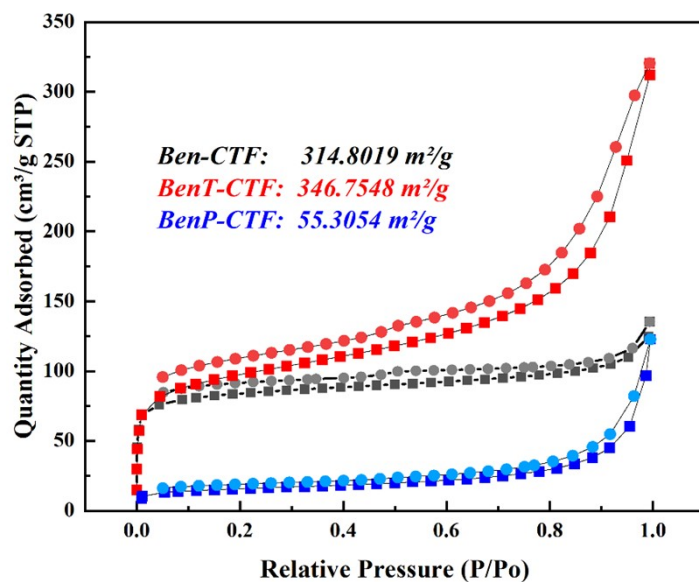

**Figure S17.** N<sub>2</sub> sorption isotherms of Ben-CTF, BenT-CTF and BenP-CTF.

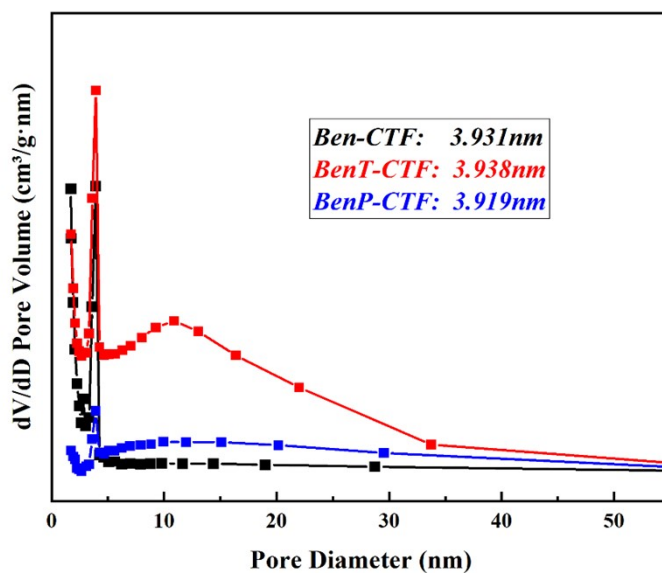

**Figure S18.** The corresponding pore size distribution of Ben-CTF, BenT-CTF and BenP-CTF.

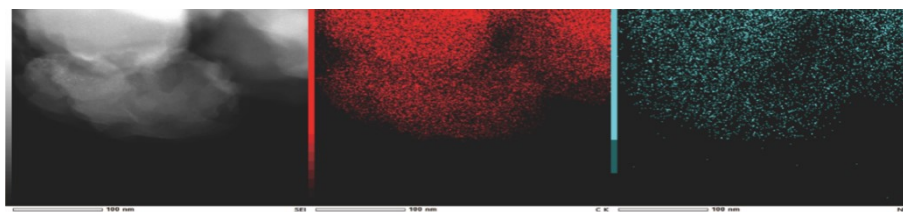

**Figure S19.** EDS images of Ben-CTF. Red and blue respectively represent the two elements of C, N.

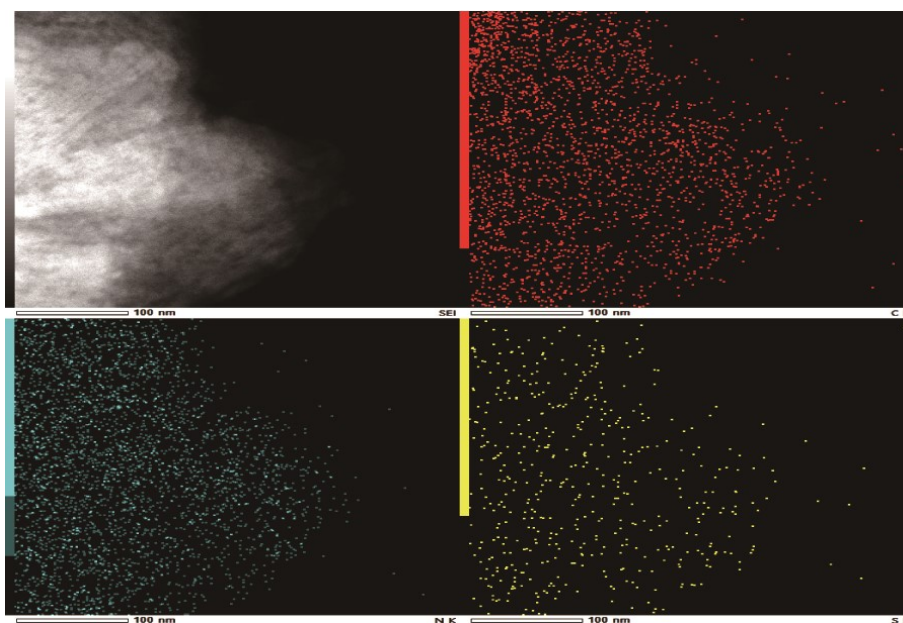

**Figure S20.** EDS images of BenT-CTF. Red, blue and yellow respectively represent the four elements of C, N, S.

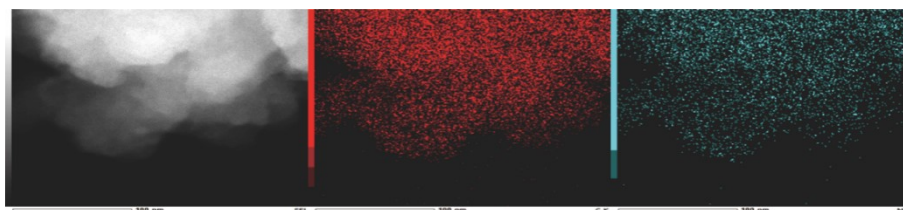

**Figure S21.** EDS images of BenP-CTF. Red and blue respectively represent the two elements of C, N.

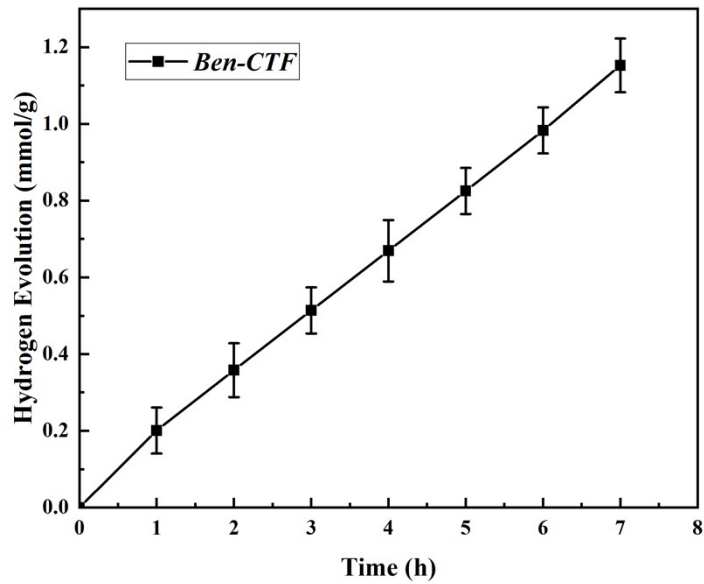

**Figure S22.** The photocatalytic hydrogen evolution performance of Ben-CTF.

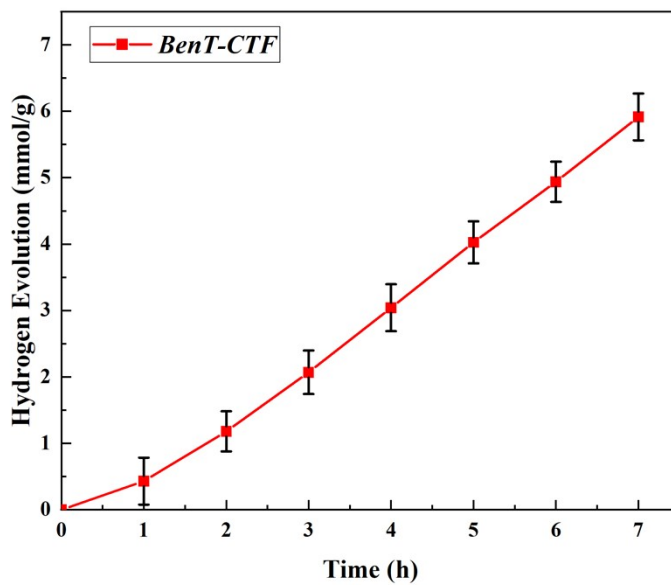

**Figure S23.** The photocatalytic hydrogen evolution performance of BenT-CTF.

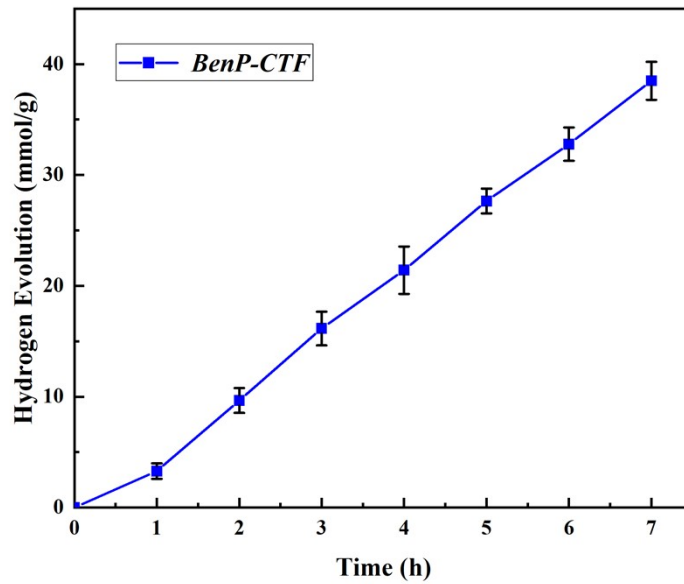

**Figure S24.** The photocatalytic hydrogen evolution performance of BenT-CTF.

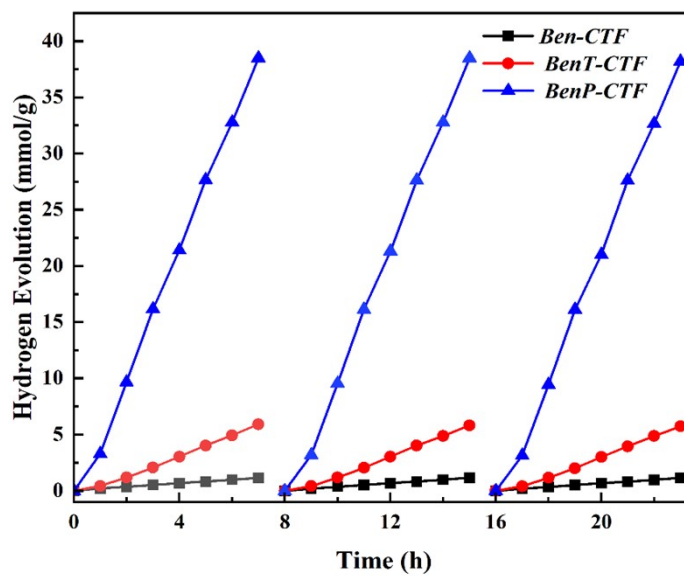

**Figure S25.** The cyclic hydrogen evolution performance of Ben-CTF, BenT-CTF and BenP-CTF.



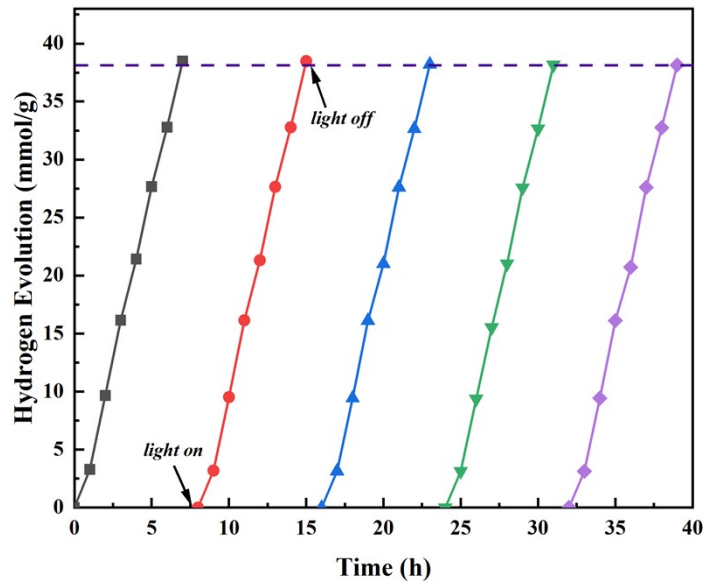

**Figure S26.** The further cyclic hydrogen evolution performance of BenP-CTF.

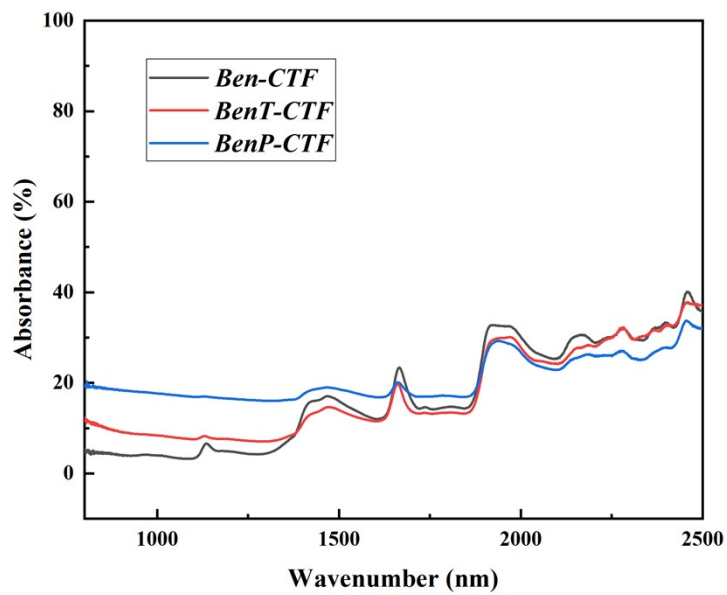

**Figure S27.** UV absorption spectra of three CTFs in the NIR region

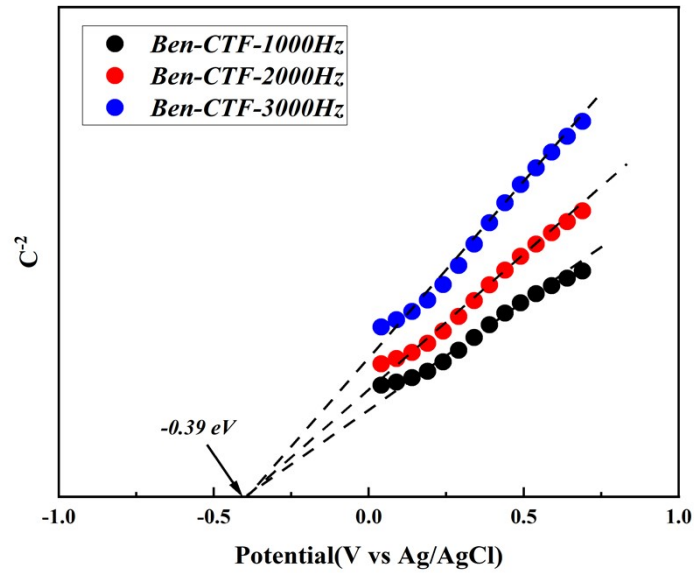

**Figure S28.** Mott-Schottky test chart for Ben-CTF.

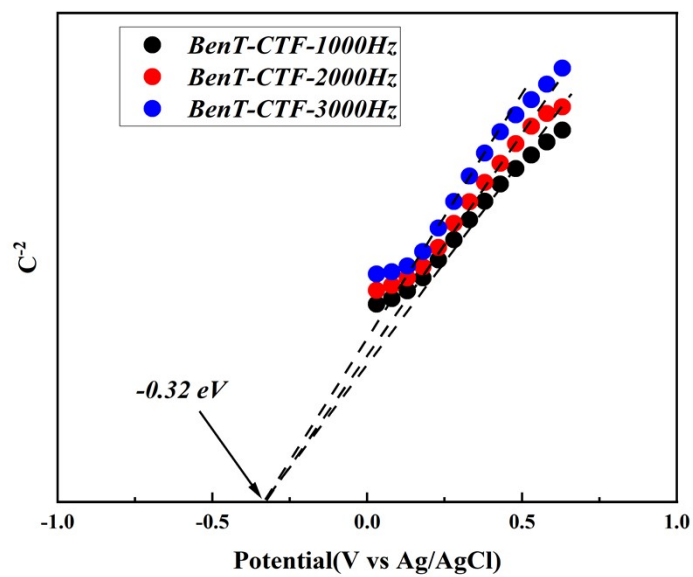

**Figure S29.** Mott-Schottky test chart for BenT-CTF.

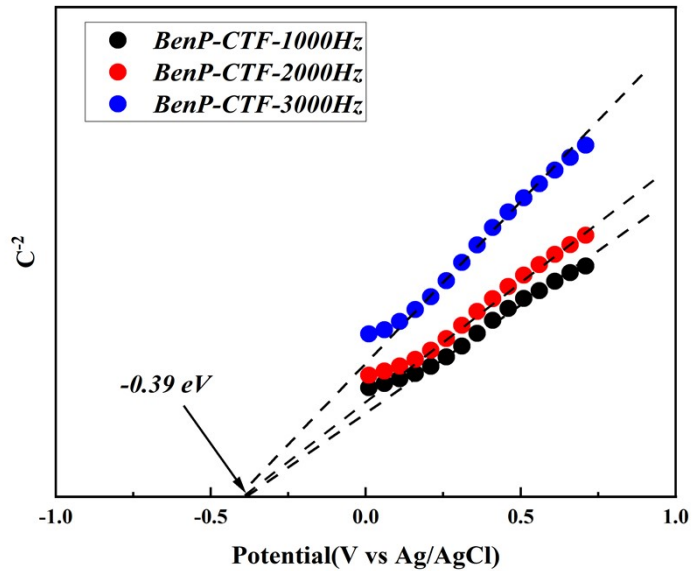

**Figure S30.** Mott-Schottky test chart for BenP-CTF.

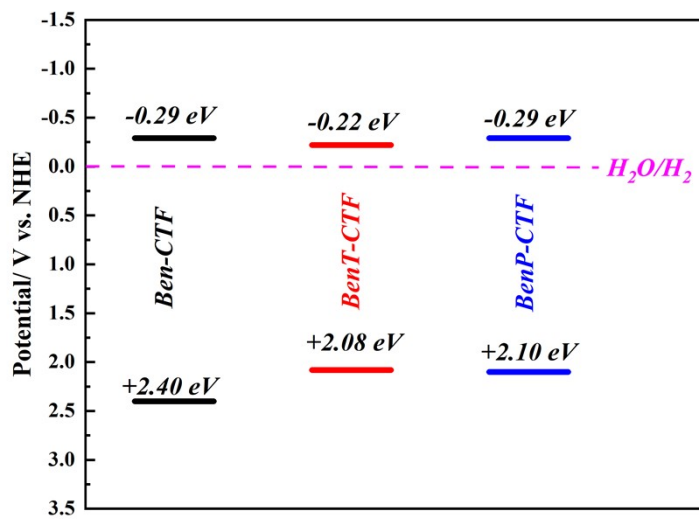

**Figure S31.** Energy band diagram of Ben-CTF, BenT-CTF, and BenP-CTF.

The method of calculating the band gap as follow equation:

$$(ah\nu)^{1/n} = A(h\nu - E_g)$$

$\alpha$  is the absorbance index,  $h$  is Planck's constant,  $\nu$  is the frequency,  $E_g$  is the forbidden bandwidth of the semiconductor, and  $A$  is a constant.  $n$  is related to the type of semiconductor, and  $n$  is taken as 1/2 in the case of direct bandgap semiconductors, and  $n$  is 2 in the case of indirect bandgap semiconductors.

CTFs is the direct bandgap semiconductor, and thus  $n$  is 1/2.

**Table S1.** Comparison of the photocatalytic H<sub>2</sub> generation performance of CTFs.

| Photocatalysts       | Condition                      | HER( $\mu$ mol/h) | Ref       |
|----------------------|--------------------------------|-------------------|-----------|
| DV-Ti-3O             | AM 1.5, MeOH, ~3 wt% Pt, 20mg  | 248.4             | [2]       |
| CTFS-1-10            | >420 nm, TEOA, ~3 wt% Pt, 50mg | 249.6(S)          | [3]       |
| CTFSe-1-10           |                                | 289.64(Se)        |           |
| CTF-HUST-S3          | >420 nm, TEOA, ~3 wt% Pt, 50mg | 791               | [4]       |
| CTFS <sub>10</sub>   | >420 nm, TEOA, ~1 wt% Pt, 20mg | 40                | [5]       |
| CTF-HUST-2           | >420 nm, TEOA, ~3 wt% Pt, 50mg | 132.35            | [6]       |
| Ben-CTF (This work)  | 1.5G, TEOA, ~3 wt% Pt, 50mg    | 13.7              | This work |
| BenT-CTF (This work) | 1.5G, TEOA, ~3 wt% Pt, 50mg    | 24.5              | This work |
| BenP-CTF (This work) | 1.5G, TEOA, ~3 wt% Pt, 50mg    | 332.5             | This work |

## References

- Giraldi, E., et al., *Metal-Stabilized Boronate Ester Cages*. Inorg Chem, 2021. **60**(15): p. 10873-10879.
- Liu, S., et al., *The Role of Dual Vacancies in TiO<sub>2</sub> for Enhanced Photocatalytic Hydrogen Generation and Pollutants Removal*. ChemCatChem, 2022. **14**(24): p. e202201107.

3. Chen, M., et al., *In-situ doping strategy for improving the photocatalytic hydrogen evolution performance of covalent triazine frameworks*. Science China Chemistry, 2023. **66**(8): p. 2363-2370.
4. Guo, L., et al., *Crystallization of Covalent Triazine Frameworks via a Heterogeneous Nucleation Approach for Efficient Photocatalytic Applications*. Chemistry of Materials, 2021. **33**(6): p. 1994-2003.
5. Li, L., et al., *Sulfur-doped covalent triazine-based frameworks for enhanced photocatalytic hydrogen evolution from water under visible light*. Journal of Materials Chemistry A, 2016. **4**(32): p. 12402-12406.
6. Wang, K., et al., *Covalent Triazine Frameworks via a Low-Temperature Polycondensation Approach*. Angew Chem Int Ed Engl, 2017. **56**(45): p. 14149-14153.
